# Supplementary material
Source: HighWire-hosted journal article supplement (https://bmjopen.bmj.com/highwire/filestream/93949/field_highwire_adjunct_files/1/FIGURE_A1.pdf)

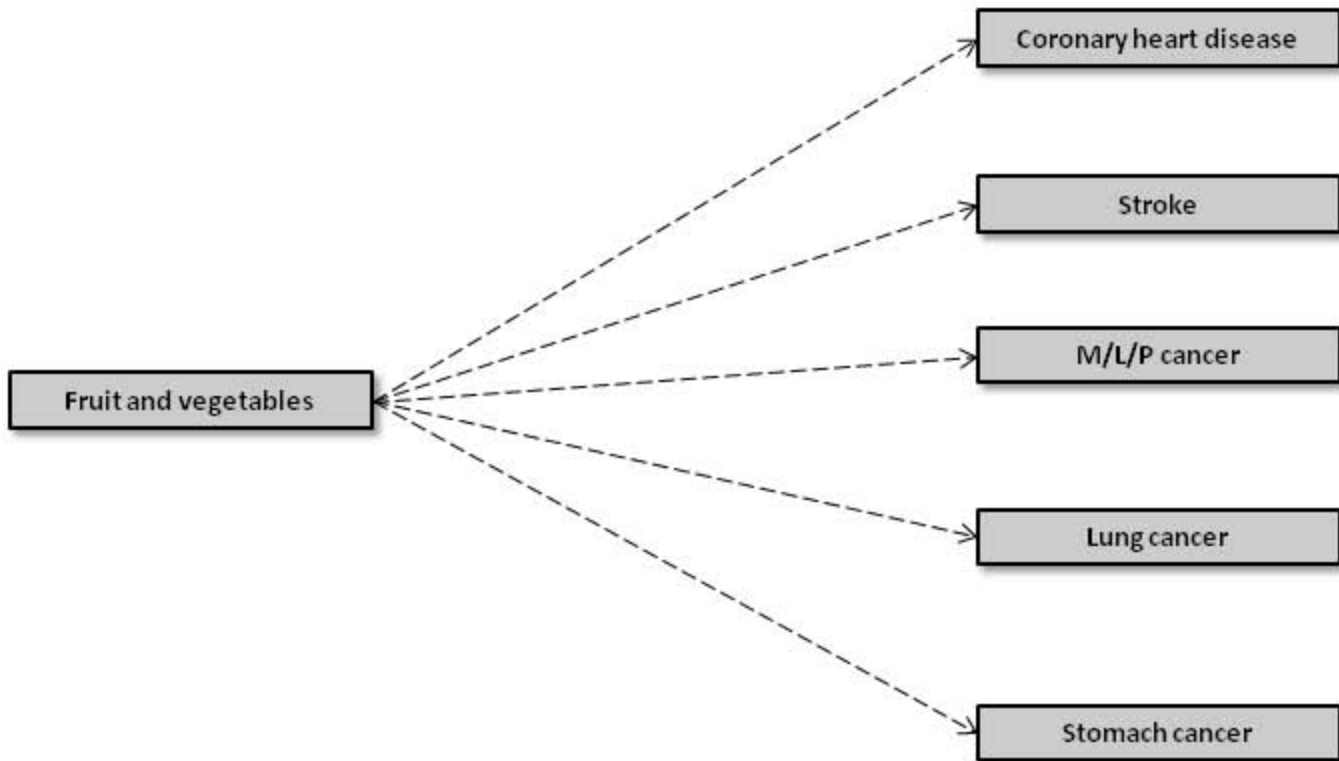

Supplement: FIGURE_A1.pdf [file FIGURE_A1.pdf]
